# Supplementary material for: Pesticide transport through the vadose zone under sugarcane in the Wet Tropics, Australia
Source: Copernicus journal article supplement (doi:10.5194/egusphere-2022-691), 2022-09-28
Supplement: Supplementary file [file egusphere-2022-691-AC1-supplement.pdf]

## **2.5 Chemical analysis**

The pesticides and their possible metabolites were analysed by Queensland Health, Coopers Plains, Queensland. All collected samples (water and soil) were separated via solid phase extraction (SPE) and examined by liquid chromatography mass spectrometry (LCMS). The analytical methodology (SPE combined with LCMS) is generally utilised by the Great Barrier Reef Catchment Loads Modelling Program (Gallen et al., 2016; Shaw et al., 2010; Vardy et al., 2015; Wallace et al., 2015). One insecticide (imidacloprid) and six herbicides namely imazapic, metolachlor, fluroxypyr, isoxaflutole, glyphosate and haloxyfop, which have been applied in recent years at the monitoring site, were tested in this study (Table 5 and Table A1).

### **2.5.1 Water Analysis**

There were two analytical method groups (QIS 33963 for herbicides and pesticides and QIS 33917 for Glyphosate) for water analysis used in Queensland Health Laboratory. The analysis was performed by direct injection method by filtering 1mL of sample using 0.2 µm filter and analysed on LCMSMS. For water herbicide analysis for imidacloprid, imazapic, metolachlor, fluroxypyr, isoxaflutole and haloxyfop, the method details are provided in Table A2. During analysis, some matrix effects were experienced, and if this increased, the Limit of Reporting (LOR) was increased.

### **2.5.2 Soil Analysis**

There were two analytical method groups (QIS 30814 for glyphosate and QIS 32456 for herbicides and pesticides) in soil / sediment. For QIS 30814: glyphosate and amino methyl phosphonic acid (AMPA) in soil/vegetation by LCMSMS, water was added to soil samples and shaken. The aqueous phase was filtered and analysed via direct injection on the LC-MSMS. On the other hand, QIS 32456: determination of herbicides in soil and sediment by LC-HRAM-Orbitrap, the soil/sediment sample was first shaken with acetone using a tabletop shaker for approximately 12 hours. The herbicides were then extracted using a QuEChERS method. The final extract was analysed by LC-HRAM-Orbitrap. The method details for pesticide and herbicides in soil and sediment are provided in Table A3. Imazapic showed low recovery (<40%) when it was analysed by QIS 33456 method.

## Appendix

**Table A2.** Method details for Pesticides in Water by Direct Injection using LCMSMS and QExactive Orbitrap.

| Pesticide                               | LOR  | Units | Accepted Uncertainty (%) | Recovery (%) | Repeatability (r) (%) | Standard Uncertainty (%) |
|-----------------------------------------|------|-------|--------------------------|--------------|-----------------------|--------------------------|
| Fluroxypyr                              | 0.05 | ug/L  | 28                       | 111          | 38                    | 28                       |
| Haloxypop (acid)                        | 0.02 | ug/L  | 26                       | 105          | 31                    | 26                       |
| Hexazinone                              | 0.01 | ug/L  | 25                       | 103          | 20                    | 12                       |
| Imazapic                                | 0.01 | ug/L  | 25                       | 101          | 14                    | 10                       |
| Imidacloprid                            | 0.02 | ug/L  | 25                       | 100          | 34                    | 21                       |
| Imidacloprid (metabolites)              | 0.02 | ug/L  | 34                       | 108          | 21                    | 34                       |
| Total Imidacloprid                      | 0.04 | ug/L  | 25                       |              |                       |                          |
| Isoxaflutole metabolite (Diketonitrile) | 0.02 | ug/L  | 25                       | 102          | 20                    | 16                       |
| Metolachlor                             | 0.01 | ug/L  | 25                       | 87           | 16                    | 11                       |

**Table A3.** Method details for Pesticides in Soil and Sediment by LCMSMS / LC-HRAM-Orbitrap.

| Pesticide          | Limit of reporting | Units | Recovery % |
|--------------------|--------------------|-------|------------|
| Fluroxypyr         | 0.001              | mg/kg | 55         |
| Haloxypop (acid)   | 0.001              | mg/kg | 69         |
| Imazapic           | 0.001              | mg/kg | 22         |
| Imidacloprid       | 0.001              | mg/kg | 93         |
| Total Isoxaflutole | 0.001              | mg/kg | 56         |
| Metolachlor        | 0.001              | mg/kg | 71         |
| AMPA               | 0.005              | mg/kg | 93         |
| Glyphosate         | 0.005              | mg/kg | 90         |
